# Supplementary material for: Iron–naphthalenedicarboxylic acid gels and their high efficiency in removing arsenic(v)
Source: Royal Society of Chemistry journal article supplement (doi:10.1039/c6cc01621a), 2016-01-01
Supplement: c6cc01621a1.pdf [file c6cc01621a1.pdf]

**Electronic Supplementary Material (ESI) for ChemComm.**  
**This journal is © The Royal Society of Chemistry 2015**

## **Iron-naphthalenedicarboxylic acid gels and their highly efficient arsenic (V) removal<sup>†</sup>**

Jianfei Sui, Lihuan Wang, Wenrong Zhao, and Jingcheng Hao\*

Key Laboratory of Colloid and Interface Chemistry & Key Laboratory of Special Aggregated  
Materials, Shandong University, Ministry of Education, Jinan 250100, P. R. China

\* Corresponding author. Tel.: +86-531-88366074, Fax: +86-531-88564750  
E-mail: [jhao@sdu.edu.cn](mailto:jhao@sdu.edu.cn)

## **I. Experimental section**

**I.1. Chemicals and materials.**  $\text{Fe}(\text{NO}_3)_3 \cdot 6\text{H}_2\text{O}$  and thiourea were purchased from Shantou Xilong Chemical Factory. NaOH and ascorbic acid were purchased from Sinopharm Chemical Reagent Co. Ltd. Ethanol was purchased from Tianjin Fuyu Fine Chemical Co. Ltd.  $\text{NaNO}_3$  was purchased from Tianjin Kermel Chemical Reagent Development Centre. HCl was purchased from Lai Yang Kangde Chemical Co., Ltd.  $\text{Na}_3\text{AsO}_4$  was purchased from Shanghai Beizhou Biotechnology Co. Ltd. All the chemicals were analytical reagent grade (A.R.). 1,4-Naphthalenedicarboxylic acid (95%) was purchased from Aladdin Chemistry Co. Ltd. All the chemicals were used without further treatment. Ultrapure water with a resistivity of  $18.25 \text{ M}\Omega\text{-cm}$  was obtained from a UPH-IV ultrapure water purifier (China).

**I.2 Gelation behavior study.** First, 0.2 mmol NDC was dissolved in 2 mL of ethanol at high temperature. Then a series of  $\text{Fe}(\text{NO}_3)_3$  with different amounts were dissolved in 2 mL of ethanol. MOG formed by mixing the above two solutions.

**I.3 Field-emission scanning electron microscopy (FE-SEM) observations.** For SEM observations, about 2  $\mu\text{L}$  of gel sample was dropt on a silica wafer surface, and most of the colloid gel was removed using small forceps to form a thin film. The wafers were freeze-dried under vacuum. The samples were observed on JEOL JSM-6700F FE-SEM at 3 kV.

**I.4 Rheological measurements.** The rheological measurements were carried out on a HAAKE RS6000 rheometer with a cone-plate system (C35/1TiL07116) for samples with high viscosity. In oscillatory measurements, an amplitude sweep at a fixed frequency of 1 Hz was carried out prior to the following frequency sweep in order to ensure the selected stress was in linear viscoelastic region.

**I.5 Fourier transform infrared spectroscopy (FT-IR) measurements.** The

FT-IR spectra were measured on a VERTEX-70/70v FT-IR spectrometer (Bruker Optics, Germany). Spectra over 4000-400  $\text{cm}^{-1}$  were obtained by taking 64 scans with a final resolution of 4  $\text{cm}^{-1}$ . Spectral manipulation was performed by the OPUS 6.5 software package (Bruker Optics, Germany).

**I.6 Adsorption isotherm.** To perform the adsorption reaction, the Fe-NDC MOGs were freeze-dried under vacuum to obtain the xerogels. For a typical process, 10 mg xerogel was submerged to 50 mL sodium arsenate solution with a series of concentration at 2, 5, 10, 15, 20, 30, 40, 60  $\text{mg}\cdot\text{L}^{-1}$  ( $\text{pH} = 7.0 \pm 0.1$ ,  $0.01 \text{ mol}\cdot\text{L}^{-1}$   $\text{NaNO}_3$  was used as background dielectric) and the mixtures were kept stirring for 24 h. The solution was then filtered with 0.22  $\mu\text{m}$  filter membrane. Filtrate was collected and analyzed by Atomic Fluorescence Spectrophotometer (AFS-930, Beijing Titan Instruments Co., Ltd.). The amount of arsenate adsorbed was calculated using the following Eq. 1:

$$q_e = (c_0 - c_e) \frac{V}{w} \quad (1)$$

where  $q_e$  is the adsorption capacity ( $\text{mg}\cdot\text{g}^{-1}$ ) at equilibrium,  $C_0$  and  $C_e$  are the initial and equilibrium liquid-phase concentrations of arsenate ( $\text{mg}\cdot\text{L}^{-1}$ ), respectively,  $V$  is the volume of solution (L) and  $w$  is the mass (g) of adsorbent used.

**I.7 Adsorption kinetics.** 50 mg xerogel and 250 mL of arsenate solution (30  $\text{mg}\cdot\text{L}^{-1}$ ,  $\text{pH} = 7.0 \pm 0.1$ ,  $0.01 \text{ mol}\cdot\text{L}^{-1}$   $\text{NaNO}_3$  was used as background dielectric) were added to beaker and the mixture was kept stirring for 24 h. Samples were taken at predetermined intervals and contents were filtered by 0.22  $\mu\text{m}$  filter membrane and filtrate was collected and analyzed by AFS.

**I.8 Arsenic analysis.** To analyse the concentration of As(V) in the solution, As (V) was reduced to As (III). 1 mL filtrate, 1 mL concentrated hydrochloric acid, 1 mL 10% thiourea and 10% ascorbic acid aqueous solution were mixed for 30 min to

transform As (V) to As (III). As(III) was analyzed using Atomic Fluorescence Spectrophotometer (AFS-930, Beijing Titan Instruments Co., Ltd.).

## II. Models used in this paper

**II.1 Langmuir isotherm model.** Langmuir isotherm *Eq.* is derived from simple mass kinetics. The *Eq.* 1 is obtained by assuming three conditions: i) no lateral interaction exists among the molecules; ii) uniform energies of adsorption were applied onto the surface; iii) no transmigration of adsorbate occurs in the plane of the surface. The Langmuir *Eq.* 2 can be represented as follows:<sup>1</sup>

$$\frac{1}{q_e} = \frac{1}{K_L q_m c_e} + \frac{1}{q_m} \quad (2)$$

where  $q_e$  is the amount of adsorbate adsorbed per unit weight of the adsorbent at equilibrium ( $\text{mg}\cdot\text{g}^{-1}$ ),  $q_m$  is the maximum adsorption capacity ( $\text{mg}\cdot\text{g}^{-1}$ ),  $K_L$  is the Langmuir constant,  $c_e$  is the equilibrium concentration of the adsorbate in solution ( $\text{mg}\cdot\text{L}^{-1}$ ).

**II.2 Freundlich isotherm model.** The Freundlich isotherm *Eq.* is derived for describing multilayer adsorption equilibrium on heterogeneous adsorbent surface with non-identical sites. This model assumes that the rate of decrease of the fraction of the surface is unoccupied by the adsorbate molecules is proportional to a certain power of the partial pressure of the adsorbate. The Freundlich isotherm *Eq.* 3 can be represented as follows:<sup>2</sup>

$$\ln q_e = \frac{1}{n} \ln C_e + \ln K_F \quad (3)$$

where  $q_e$  and  $c_e$  have the same meanings as that of *Eq.* 1,  $K_F$  is the Freundlich constant,  $n$  is the Freundlich constant, which reflects adsorption intensity.

**II.3 The pseudo-first-order kinetic model.** The pseudo-first-order kinetic model also known as Lagergren and Svenska *Eq.* 4 can be represented as follows:<sup>3</sup>

$$\ln(q_e - q_t) = \ln q_e - k_1 t \quad (4)$$

where  $q_e$  and  $q_t$  are the amounts of arsenic adsorbed ( $\text{mg}\cdot\text{g}^{-1}$ ) at equilibrium and at any time  $t$  (min), respectively, and  $k_1$  is the rate constant of adsorption ( $\text{min}^{-1}$ ). Values of  $k_1$  were calculated from the plots of  $\ln(q_e - q_t)$  vs.  $t$ .

**II.4 The pseudo-second-order kinetic model.** This model is also used to predict the kinetic parameters, the *Eqs.* 5 and 6 can be represented as:<sup>4</sup>

$$\frac{t}{q_t} = \frac{1}{h} + \frac{t}{q_e} \quad (5)$$

and

$$h = k_2 q_e^2 \quad (6)$$

where  $q_e$  and  $q_t$  are the amounts of arsenic adsorbed ( $\text{mg}\cdot\text{g}^{-1}$ ) at equilibrium and at any time  $t$  (min),  $h$  is the initial sorption rate ( $\text{mg}\cdot\text{g}^{-1}\cdot\text{min}^{-1}$ ). The values of  $q_e$  (1/slope),  $k_2$  (slope<sup>2</sup>/intercept), and  $h$  (1/intercept) can be calculated from the plots of  $t/q_t$  vs.  $t$ .

### II.5 The calculation of Gibbs Free Energy ( $\Delta G^0$ )

The Gibbs free energy ( $\Delta G^0$ ) is calculated from the *Eq.*:

$$\Delta G^0 = -RT \ln K_L \quad (7)$$

where  $R$  is the ideal gas constant,  $T$  (K) is the absolute temperature and  $K_L$  is the Langmuir constant. The  $\Delta G^0$  calculated using the Langmuir constant ( $K_L$ ) is  $-28.495 \text{ kJ}\cdot\text{mol}^{-1}$ , indicating that the arsenic adsorption is spontaneous.

### III. Supplementary Figures and Tables

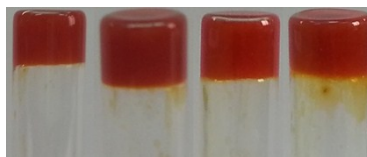

**Fig. S1** Photographs of typical samples after 24 h.  $c_{\text{NDC}} = 100 \text{ mmol}\cdot\text{L}^{-1}$  and  $c_{\text{Fe}^{3+}}$  (from left to right) = 75, 100, 125, 150  $\text{mmol}\cdot\text{L}^{-1}$ , respectively.

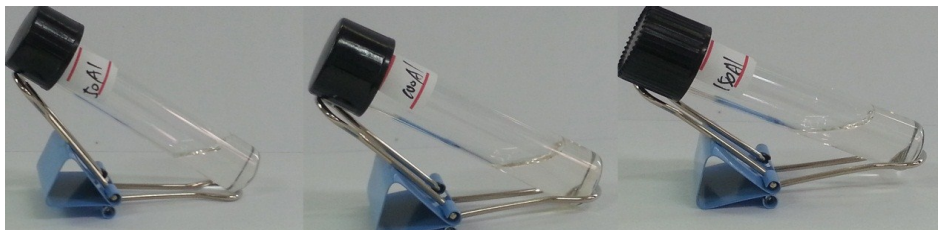

**Fig. S2** Photographs of typical samples after 48 h.  $c_{\text{NDC}} = 100 \text{ mmol}\cdot\text{L}^{-1}$  and  $c_{\text{Al}^{3+}}$  (from left to right) = 50, 100, 150  $\text{mmol}\cdot\text{L}^{-1}$ , respectively.

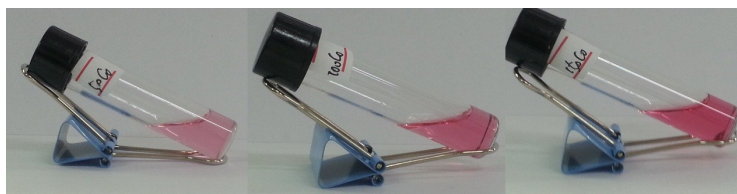

**Fig. S3** Photographs of typical samples after 48 h.  $c_{\text{NDC}} = 100 \text{ mmol}\cdot\text{L}^{-1}$  and  $c_{\text{Co}^{2+}}$  (from left to right) = 50, 100, 150  $\text{mmol}\cdot\text{L}^{-1}$ , respectively.

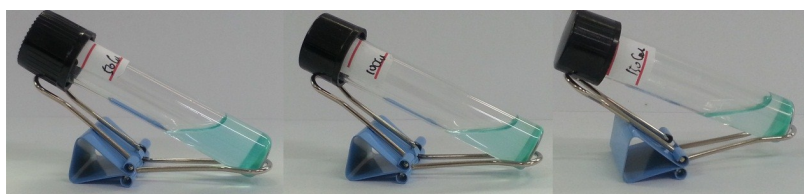

**Fig. S4** Photographs of typical samples after 48 h.  $c_{\text{NDC}} = 100 \text{ mmol}\cdot\text{L}^{-1}$  and  $c_{\text{Cu}^{2+}}$  (from left to right) = 50, 100, 150  $\text{mmol}\cdot\text{L}^{-1}$ , respectively.

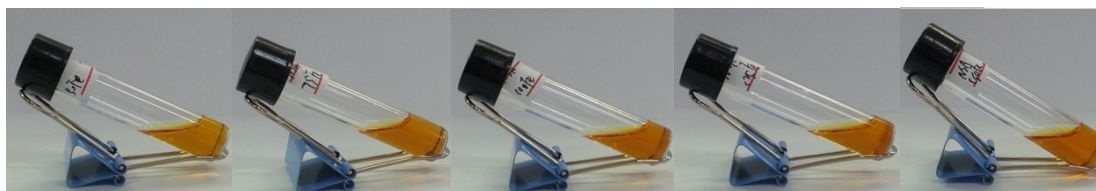

**Fig. S5** Photographs of typical samples after 48 h.  $c_{\text{NSA}} = 100 \text{ mmol}\cdot\text{L}^{-1}$  and  $c_{\text{Fe}^{3+}}$  (from left to right, from top to bottom) = 50, 75, 100, 125, 150  $\text{mmol}\cdot\text{L}^{-1}$ , respectively.

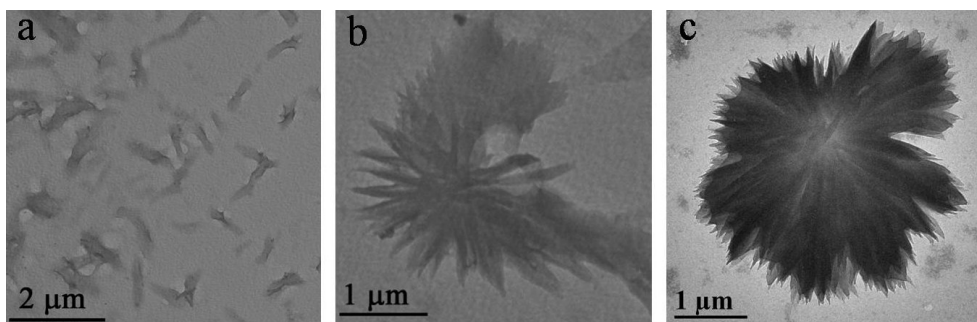

**Fig. S6** TEM images of MOG formation of  $100 \text{ mmol}\cdot\text{L}^{-1}$  NDC and  $50 \text{ mmol}\cdot\text{L}^{-1}$   $\text{Fe}^{3+}$  at different times: 24 h (a), 36 h (b), and 48 h (c).

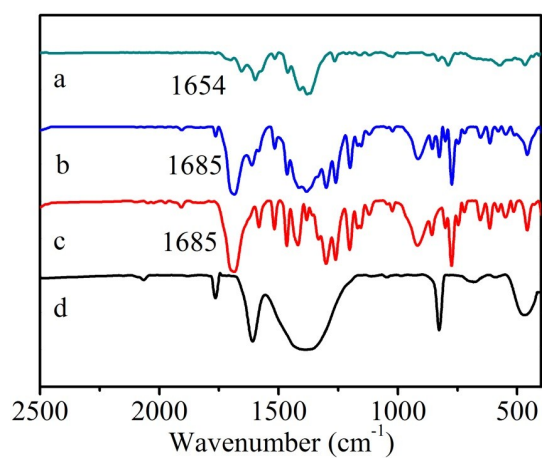

**Fig. S7** FT-IR spectra of MOGs (a), mixture of  $\text{Fe}(\text{NO}_3)_3$  and NDC (b), NDC (c),  $\text{Fe}(\text{NO}_3)_3$  (d).

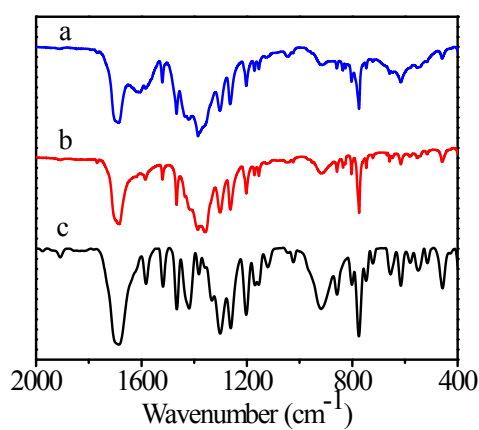

**Fig. S8** FT-IR spectra of Al-NDC (a), Co-NDC (b), and NDC (c).

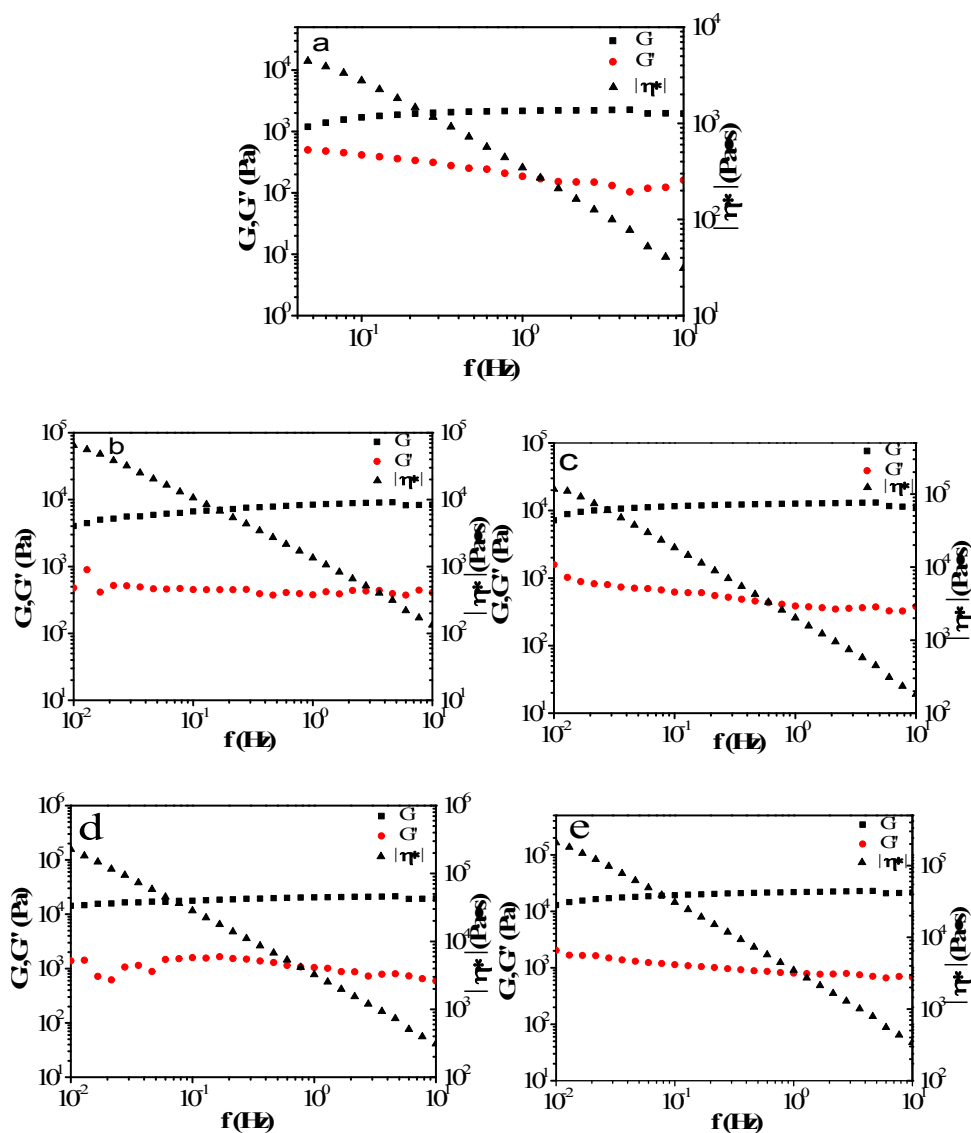

**Fig. S9** Dynamically rheological results of typical samples of Fe-NDC MOGs. The  $c_{\text{NDC}}$  is  $100 \text{ mmol}\cdot\text{L}^{-1}$  and  $c_{\text{Fe}^{3+}}$ : 50 (a), 75 (b), 100 (c), 125 (d), and 150  $\text{mmol}\cdot\text{L}^{-1}$  (e), respectively.

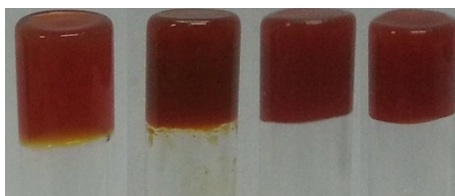

**Fig. S10.** Photographs of  $100 \text{ mmol}\cdot\text{L}^{-1}$  NDC/ $100 \text{ mmol}\cdot\text{L}^{-1}$   $\text{Fe}^{3+}$  MOGs formed in (from left to right) n-propyl alcohol, n-Butyl alcohol, EtOH/ $\text{H}_2\text{O}$ , DMF/ $\text{H}_2\text{O}$  after 24 h, respectively.



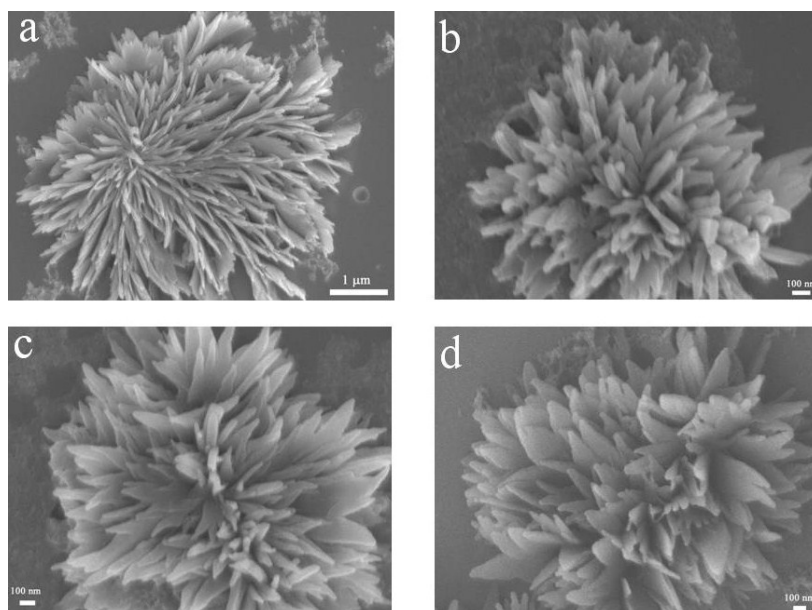

**Fig. S11** SEM images of MOG formation of  $100 \text{ mmol}\cdot\text{L}^{-1}$  NDC and  $50 \text{ mmol}\cdot\text{L}^{-1}$   $\text{Fe}^{3+}$  after 24 h in n-propyl alcohol (a), n-butyl alcohol (b), EtOH/ $\text{H}_2\text{O}$  (c), DMF/ $\text{H}_2\text{O}$  (d).

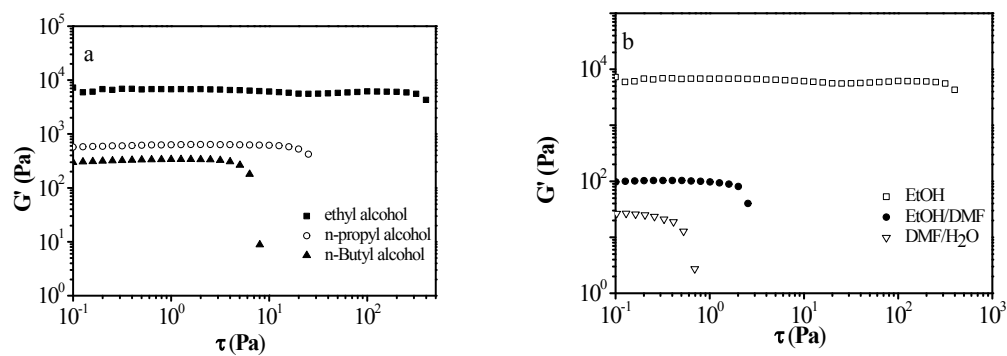

**Fig. S12** Elastic modulus ( $G'$ ) as a function of oscillatory stress with different solvents, (a) EtOH, n-propyl alcohol, n-Butyl alcohol, (b) EtOH, EtOH/ $\text{H}_2\text{O}$ , DMF/ $\text{H}_2\text{O}$ .

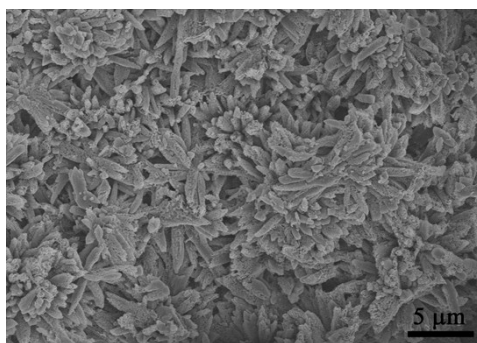

**Fig. S13** SEM image of MOG after freezing drying.

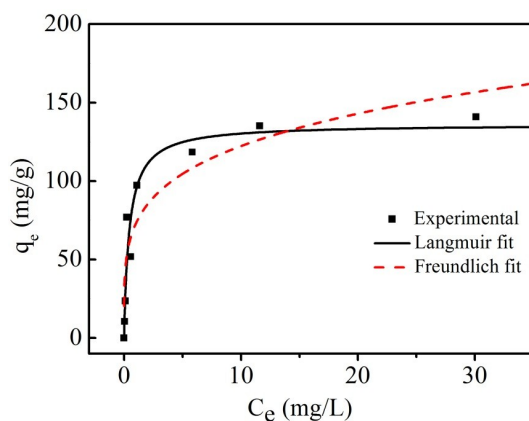

**Fig. S14** Langmuir and Freundlich isotherms.  $\text{pH} = 7.0 \pm 0.1$ ,  $m_{\text{xerogel}} = 10 \text{ mg}$ ,  $T = 298 \text{ K}$ .

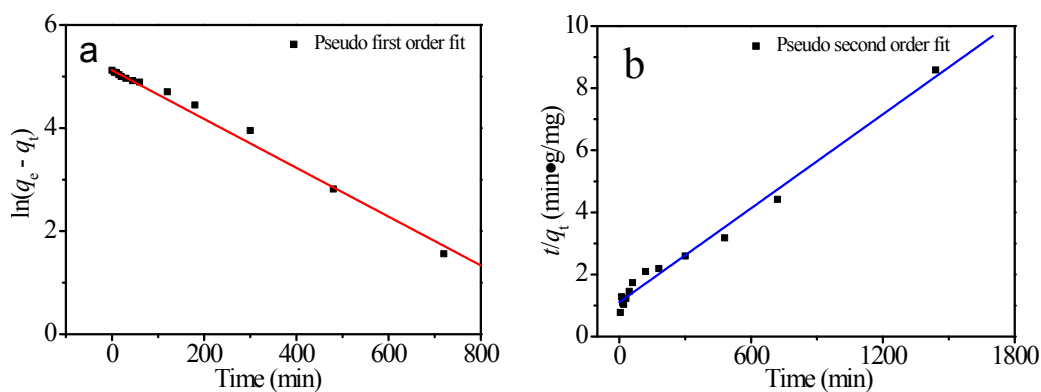

**Fig. S15** (a) Pseudo-first-order and (b) pseudo-second-order plots for arsenic adsorption. Volume: 250 mL, initial As (V) concentration:  $30 \text{ mg}\cdot\text{L}^{-1}$ ,  $\text{pH} = 7.0 \pm 0.1$ ,  $m_{\text{xerogel}} = 50 \text{ mg}$ ,  $T = 298 \text{ K}$ .

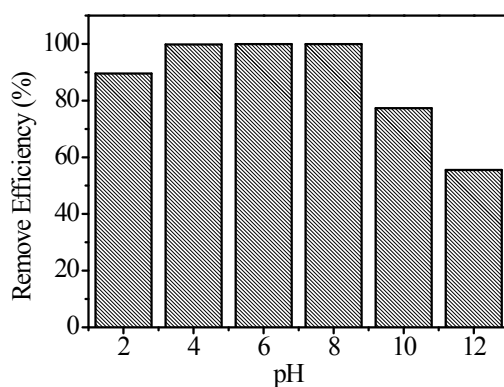

**Fig. S16** Effect of pH on As (V) adsorption (volume: 50 mL, initial As concentration:  $5 \text{ mg}\cdot\text{L}^{-1}$ ,  $m_{\text{xerogel}} = 10 \text{ mg}$ ,  $T = 298 \text{ K}$ , equilibrium time = 24 h).

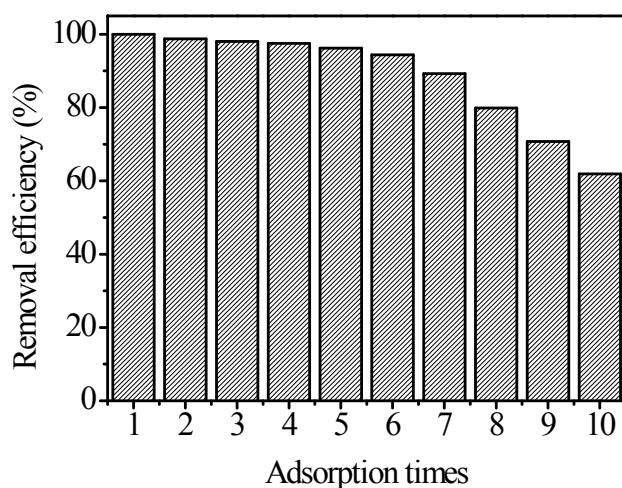

**Fig. S17** Re-adsorption of arsenite by xerogel (volume: 50 mL, initial As concentration:  $5 \text{ mg}\cdot\text{L}^{-1}$ ,  $m_{\text{xerogel}} = 10 \text{ mg}$ ,  $T = 298 \text{ K}$ , equilibrium time = 24 h).

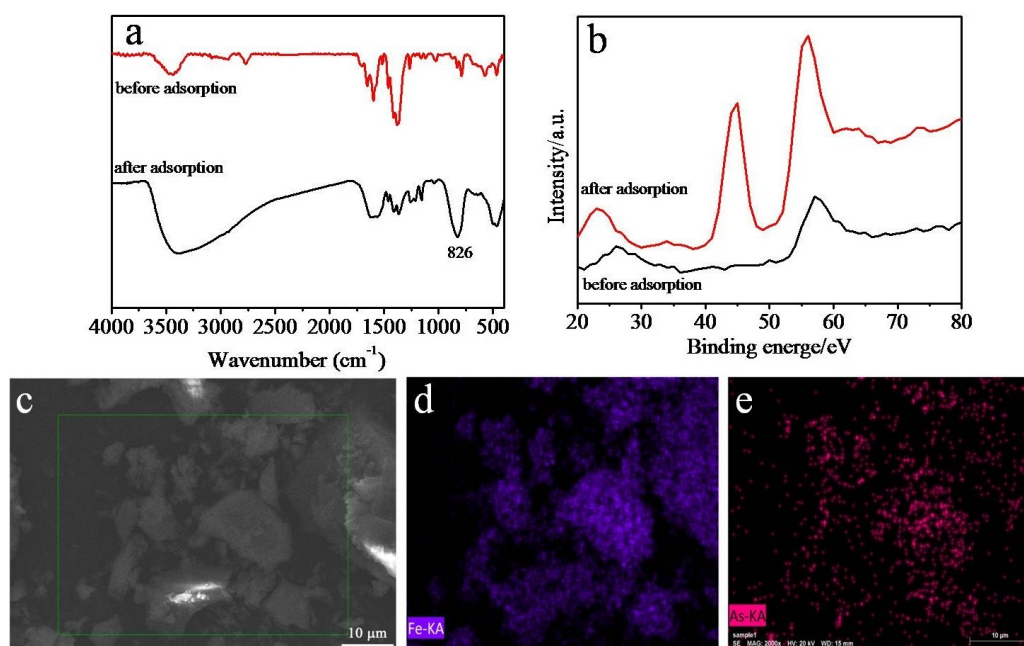

**Fig. S18** (a) FT-IR spectra of xerogels before (red) and after (black) adsorption, (b) XPS spectra of xerogel before (black) and after (red) adsorption, (c) SEM image of xerogel after adsorption, (d) and (e) corresponding phase mappings of Fe K $\alpha$ 1 and As K $\alpha$ 1, respectively.

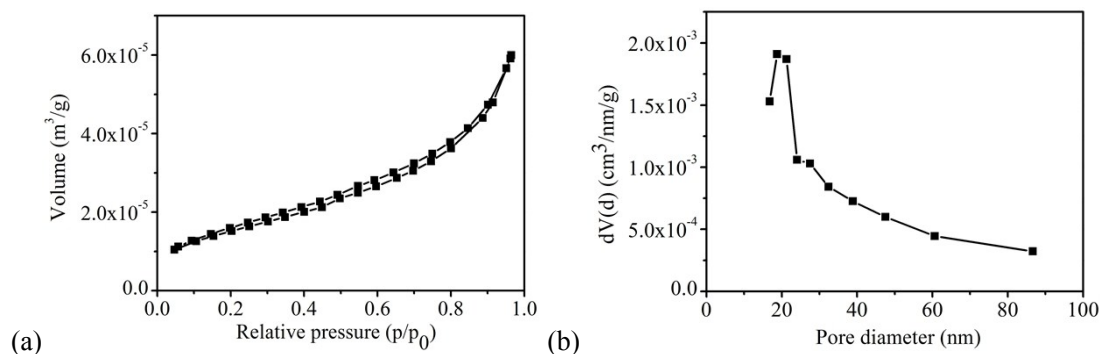

**Fig. S19** The specific surface-area (a) and pore-size distribution (b) of xerogels. The isotherm is type II of five types of adsorption isotherms in the classification of Brunauer, Emertt, and Teller.<sup>5,6</sup> The hysteresis is of type H3, suggesting the presence of slit-type pores.

**Table S1** The arsenic removal rate by MOGs and the residual concentration of arsenic.

| Initial concentration (mg·L <sup>-1</sup> ) | Residual concentration (mg·L <sup>-1</sup> ) | Removal rate (%) |
|---------------------------------------------|----------------------------------------------|------------------|
| 2                                           | 0.0031                                       | 99.85            |
| 5                                           | 0.0042                                       | 99.92            |
| 10                                          | 0.24                                         | 97.6             |
| 15                                          | 0.568                                        | 96.21            |
| 20                                          | 1.118                                        | 94.41            |
| 30                                          | 5.844                                        | 80.52            |
| 40                                          | 11.608                                       | 70.98            |
| 60                                          | 30.114                                       | 49.81            |

**Table S2** Comparison of adsorption capacity of arsenic on various adsorbents.

| Adsorbents                                   | Equilibrium concentration (mg·L <sup>-1</sup> ) | pH | Specific surface-area (m <sup>2</sup> ·g <sup>-1</sup> ) | Sorption capacity (mg·g <sup>-1</sup> ) | Refs. in text |
|----------------------------------------------|-------------------------------------------------|----|----------------------------------------------------------|-----------------------------------------|---------------|
| Fe-NDC MOGs                                  | 0.05                                            | 7  | 55                                                       | 144                                     | This work     |
| Fe-Mn binary oxide                           | 1.9                                             | 7  | N/A                                                      | 63.8                                    | 30            |
| Zr-loaded resin                              | 0.2                                             | 7  | N/A                                                      | 19.5                                    | 31            |
| Nanocrystalline TiO <sub>2</sub>             | 0.15                                            | 7  | 330                                                      | 11.2                                    | 32            |
| Fe-BTC polymer                               | N/A                                             | 7  | N/A                                                      | 12.287                                  | 33            |
| Fe <sub>2</sub> O <sub>3</sub> nanoparticles | N/A                                             | 7  | N/A                                                      | 6.365                                   | 33            |
| Bulk Fe <sub>2</sub> O <sub>3</sub> powders  | N/A                                             | 7  | N/A                                                      | 1.098                                   | 33            |

**Table S3** Parameters of pseudo-first-order and pseudo-second-order models.

| pseudo-first-order                  |                         |        | pseudo-second-order                 |                                     |                                                    |        |
|-------------------------------------|-------------------------|--------|-------------------------------------|-------------------------------------|----------------------------------------------------|--------|
| $q_m / \text{mg}\cdot\text{g}^{-1}$ | $k_1 / \text{min}^{-1}$ | $R^2$  | $q_m / \text{mg}\cdot\text{g}^{-1}$ | $h / \text{mg}\cdot\text{min}^{-1}$ | $k_2 / \text{mg}\cdot\text{g}\cdot\text{min}^{-1}$ | $R^2$  |
| 167.72                              | 0.004730                | 0.9994 | 198.0200                            | 0.9042                              | $2.300\times 10^{-5}$                              | 0.9846 |

**Table S4** Arsenic speciation in different pH<sup>7</sup>.

| pH                 | < 2.3                           | 2.3-6.9                                      | 6.9-11                          | > 11                           |
|--------------------|---------------------------------|----------------------------------------------|---------------------------------|--------------------------------|
| Arsenic speciation | H <sub>3</sub> AsO <sub>4</sub> | H <sub>2</sub> AsO <sub>4</sub> <sup>-</sup> | HAsO <sub>4</sub> <sup>2-</sup> | AsO <sub>4</sub> <sup>3-</sup> |

**Table S5.** Zeta potential of MOGs at pH = 7.

| $c_{\text{Fe}^{3+}} \text{ (mM)}$ | Zeta potential (mV) |
|-----------------------------------|---------------------|
| 50                                | +42.78 ± 0.72       |
| 75                                | +49.11 ± 2.13       |
| 100                               | +67.10 ± 0.40       |
| 125                               | +70.91 ± 0.21       |
| 150                               | +77.28 ± 0.36       |

## References

- 1 I. Langmuir, *J. Am. Chem. Soc.* 1916, **38**, 2221.
- 2 H. M. F. Freundlich, *J. Phys. Chem.* 1906, **57**, 385.
- 3 S. Lagergren, About the theory of so-called adsorption of soluble substances. **1898**.
- 4 Y. S. Ho and G. McKay, *Proc. Biochem.* 1999, **34**, 451.
- 5 M. Khalfaoui, S. Knani, M. A. Hachicha, A. B. Lamine, *J. Colloid Interface Sci.* 2003, **263**, 350.
- 6 C. Tien, Adsorption calculation and modeling, in: series in chemical engineering, Butterworth–Heinemann, London, 1994.
- 7 B. Zhu, X. Yu, Y. Jia, F. Peng, B. Sun, M. Zhang, T. Luo, J. Liu and X. Huang, *J. Phys. Chem. C* 2012, **116**, 8601.
